# Supplementary material for: Europium(iii) β-diketone complex as portable luminescent chemosensor for naked eye Cu2+ detection and recyclable on–off–on vapor response
Source: Royal Society of Chemistry journal article supplement (doi:10.1039/c5ra19710d), 2015-01-01
Supplement: c5ra19710d2.pdf [file c5ra19710d2.pdf]

**Europium (III)  $\beta$ -Diketone Complex as Portable  
Luminescent Chemosensor for Naked Eye  $\text{Cu}^{2+}$  Detection  
and Recyclable On–Off–On Vapor Response**

Fangyi Cao, Zheng Yuan, Junhua Liu, Jun Ling\*

*MOE Key Laboratory of Macromolecular Synthesis and Functionalization,  
Department of Polymer Science and Engineering, Zhejiang University, 310027  
Hangzhou, China.*

\* Correspondence author: [lingjun@zju.edu.cn](mailto:lingjun@zju.edu.cn)

Supporting Information

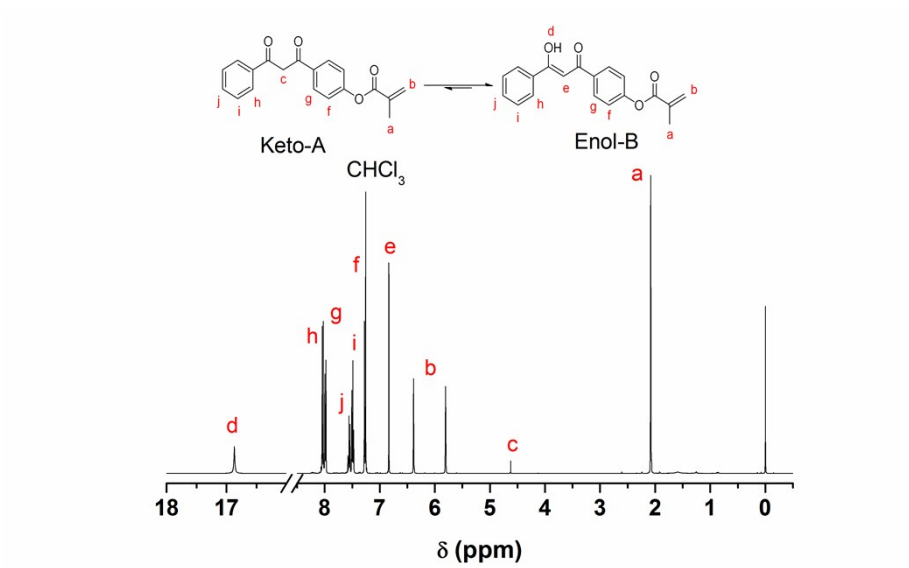

**Figure S1.** <sup>1</sup>H NMR spectrum of DKMA monomer.

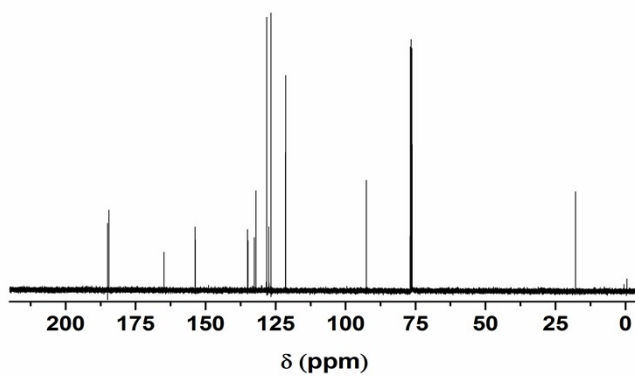

**Figure S2.** <sup>13</sup>C NMR spectrum of DKMA monomer.

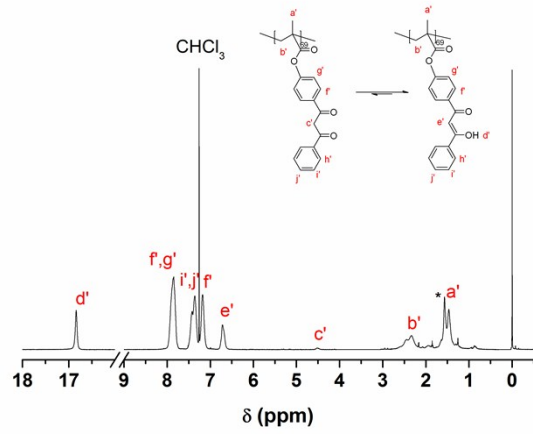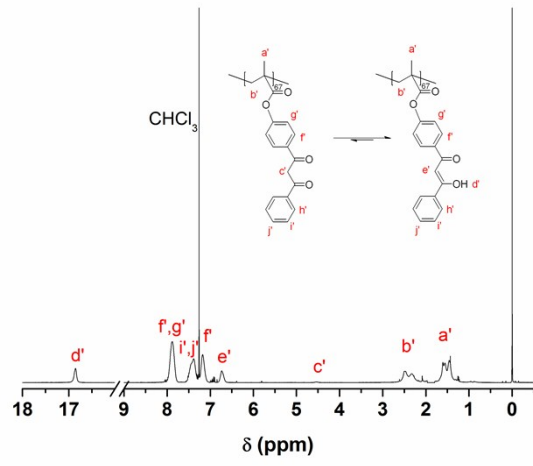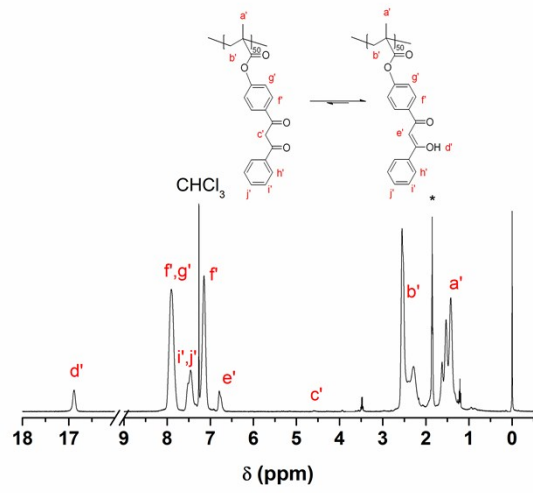

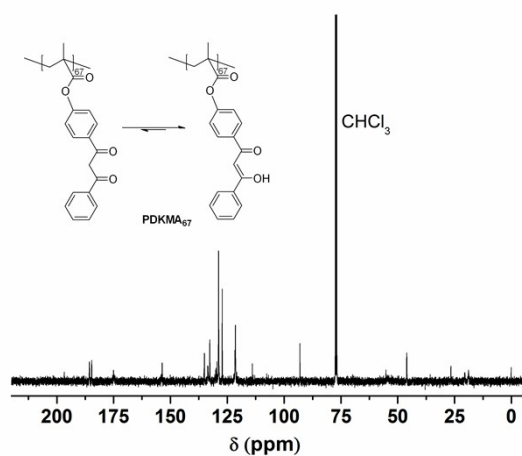

**Figure S3.**  $^1\text{H}$  NMR spectra of homo-polymer of PDKMAs (from top to bottom: **1**, **2** and **3** in Table 1) and  $^{13}\text{C}$  NMR profile of PDKMA<sub>67</sub>. \*: water.

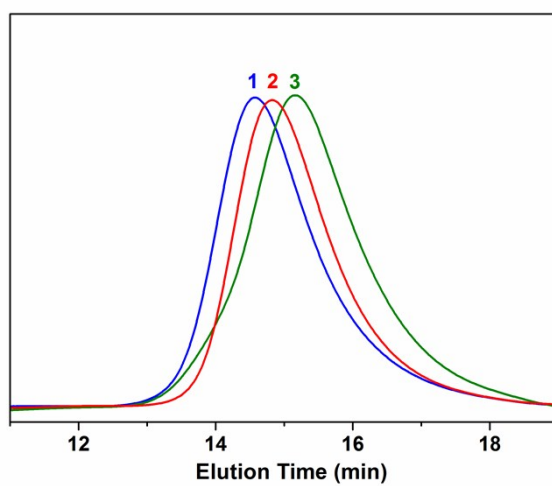

**Figure S4.** SEC traces of polymers of PDKMA<sub>69</sub> (**1**), PDKMA<sub>67</sub> (**2**) and PDKMA<sub>50</sub> (**3**).

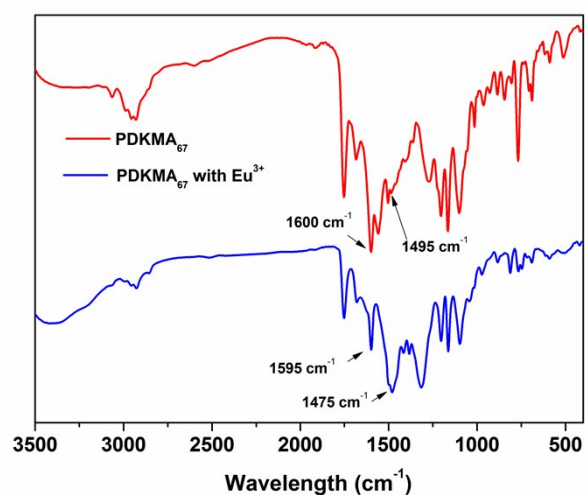

**Figure S5.** FT-IR spectra (KBr) of PDKMA<sub>67</sub> and Eu<sup>3+</sup>-PDKMA<sub>67</sub> complex.

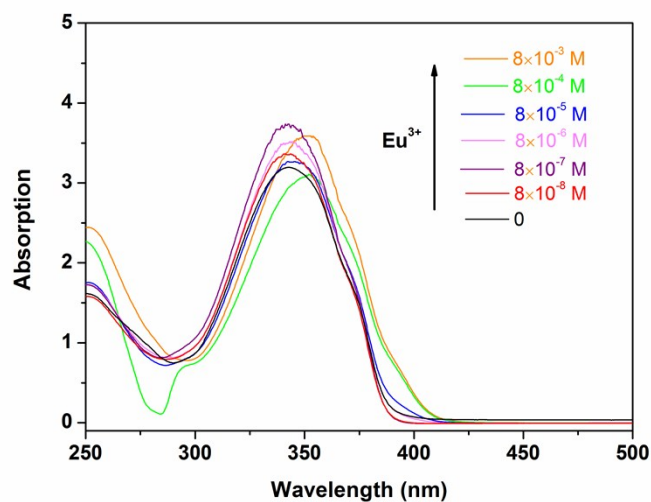

**Figure S6.** UV-Vis spectra of 0.05 mg/mL PDKMA<sub>67</sub> and PDKMA<sub>67</sub> with different concentrations of Eu<sup>3+</sup> in THF.

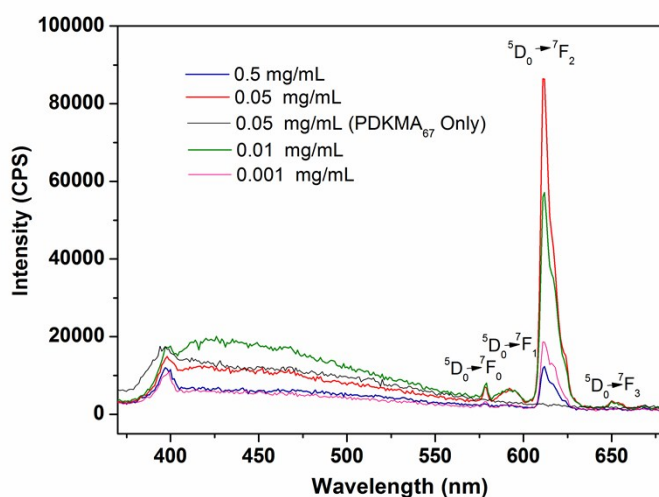

**Figure S7.** Fluorescent spectra of  $\text{Eu}^{3+}$  complex in aqueous solution ( $2 \times 10^{-5}$  mol/L) with different concentrations of PDKMA<sub>67</sub> under excitation of 350 nm UV light at 25 °C. The molar ratio of PDKMA and  $\text{C}_2\text{H}_5\text{ONa}$  is 1:1.

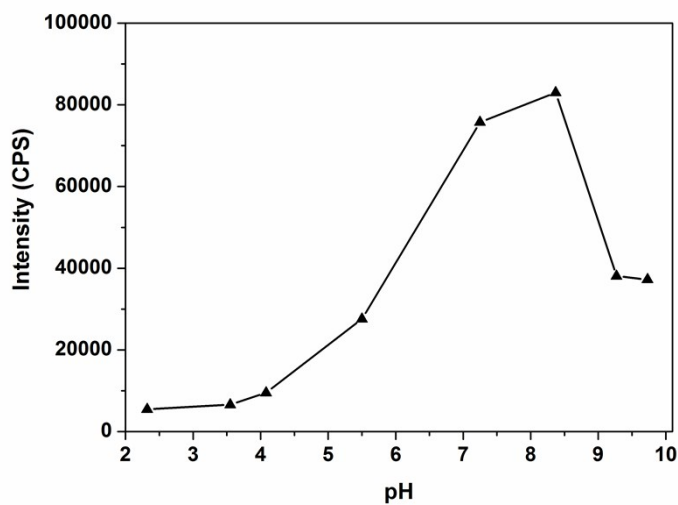

**Figure S8.** The PL intensities of  $\text{Eu}^{3+}$ -PDKMA complex in pH ranges between 2 and 10 at 0.05 mg/mL PDKMA coordinated with  $\text{Eu}^{3+}$  ( $2 \times 10^{-5}$  mol/L).

### Quantum chemical calculation details of coordination of PDKMA with $\text{Eu}^{3+}$

All the geometries were optimized under gas phase using density functional theory (DFT) without any symmetry restrictions as implemented in Gaussian 03 program.<sup>1</sup> Becke's three-parameter-Lee-Yang-Parr hybrid functional B3LYP method was carried

out with 6-31G(d,p) basis sets by adding diffuse d functions to C and O atoms and diffuse p functions to H atoms. Eu atom was treated with Stuttgart-Dresden ECP. The analytical frequency calculation confirmed that the geometries had no imaginary frequency and verified the nature of minima. The basis sets 6-311+G(d,p) for C, H and O atoms were used in high-level energy calculation. Time-dependent density functional theory (TD-DFT) was used for the excited state calculations.

## References:

1. M. J. Frisch, G. W. Trucks, H. B. Schlegel, G. E. Scuseria, M. A. Robb, J. R. Cheeseman, J. A. Montgomery Jr., T. Vreven, K. N. Kudin, J. C. Burant, N. J. Millam, S. S. Iyengar, J. Tomasi, V. Barone, B. Mennucci, M. Cossi, G. Scalmani, N. Rega, G. A. Petersson, H. Nakatsuji, M. Hada, M. Ehara, K. Toyota, R. Fukuda, J. Hasegawa, M. Ishida, T. Nakajima, Y. Honda, M. Klene, X. Li, J. E. Knox, H. P. Hratchian, J. B. Cross, V. Bakken, C. Adamo, J. Jaramillo, R. Gomperts, R. E. Stratmann, O. Yazyev, A. J. Austin, R. Cammi, C. Pomelli, J. W. Ochterski, P. Y. Aynla, K. Morokuma, G. A. Voth, P. Salvador, J. J. Dannenberg, V. G. Zakrzewski, S. Dapprich, A. D. Daniels, M. C. Strain, O. Farkas, D. K. Malick, A. D. Rabuck, K. Raghavachari, J. B. Foresman, J. V. Ortiz, Q. Cui, A. G. Baboul, S. Clifford, J. Cioslowski, B. B. Stefanov, G. Liu, A. Liashenko, P. Piskorz, I. Komaromi, R. L. Martin, D. J. Fox, T. Keith, M. A. Al-Laham, C. Y. Peng, A. Nanayakkara, M. Challacombe, P. M. W. Gill, B. Johnson, W. Chen, M. W. Wong, C. Gonzalez and J. A. Pople, *Gaussian 03 (Revision E.01)*, Gaussian, Inc., Wallingford, CT, USA, 2004.
